# Supplementary material for: Mononuclear palladium and heterodinuclear palladium–ruthenium complexes of semicarbazone ligands. Synthesis, characterization, and application in C–C cross-coupling reactions
Source: Royal Society of Chemistry journal article supplement (doi:10.1039/c2ra20105d), 2012-01-01
Supplement: c2ra20105d.pdf [file c2ra20105d.pdf]

## **Electronic Supplementary Information**

### **Mononuclear palladium and heterodinuclear palladium-ruthenium complexes of semicarbazone ligands. Synthesis, characterization, and application in C-C cross-coupling reactions**

Sayanti Datta,<sup>a</sup> Dipravath Kumar Seth,<sup>a</sup> Sarmistha Halder,<sup>a</sup>  
William S. Sheldrick,<sup>b</sup> Heike Mayer-Figge,<sup>b</sup> Michael G. B. Drew<sup>c</sup>  
and Samaresh Bhattacharya\*<sup>a</sup>

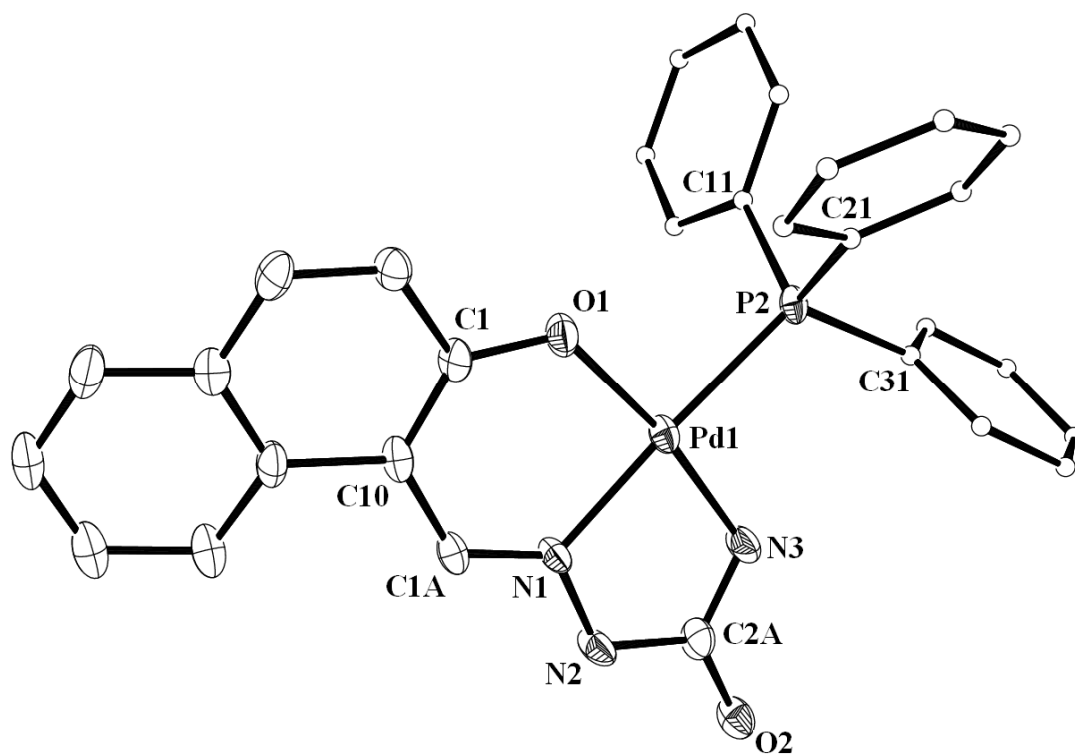

**Fig. S1** View of the 1c complex.

**Table S1** Selected bond distances and bond angles for **1c** and **2c**

| <b>1c</b>          |           |                  |           |
|--------------------|-----------|------------------|-----------|
| Bond distances (Å) |           |                  |           |
| Pd1-P(2)           | 2.262(2)  | C(1)-O(1)        | 1.323(11) |
| Pd1-O(1)           | 2.005(8)  | C(1A)-N(1)       | 1.290(11) |
| Pd1-N(1)           | 1.979(7)  | N(1)-N(2)        | 1.373(11) |
| Pd1-N(3)           | 1.965(9)  | N(2)-C(2A)       | 1.376(14) |
|                    |           | C(2A)-N(3)       | 1.336(5)  |
|                    |           | C(2A)-O(2)       | 1.251(13) |
| Bond angles (°)    |           |                  |           |
| N(1)-Pd(1)-P(2)    | 174.5(3)  | N(1)-Pd(1)-O(1)  | 91.3(3)   |
| O(1)-Pd(1)-N(3)    | 171.2(3)  | N(1)-Pd(1)-N(3)  | 80.1(3)   |
| <b>2c</b>          |           |                  |           |
| Bond distances (Å) |           |                  |           |
| Pd(1)-P(3)         | 2.281(4)  | C(51)-O(3)       | 1.317(18) |
| Pd(1)-O(3)         | 1.994(11) | C(41)-N(3)       | 1.281(17) |
| Pd(1)-N(3)         | 2.014(10) | N(2)-N(3)        | 1.364(16) |
| Pd(1)-N(1)         | 1.967(11) | N(2)-C(40)       | 1.376(17) |
| Ru(1)-P(2)         | 2.392(4)  | C(40)-N(1)       | 1.318(18) |
| Ru(1)-P(1)         | 2.381(4)  | C(40)-O(2)       | 1.299(18) |
| Ru(1)-Cl(1)        | 2.414(4)  | C(39)-O(1)       | 1.191(19) |
| Ru(1)-C(39)        | 1.763(15) |                  |           |
| Ru(1)-N(2)         | 2.054(11) |                  |           |
| Ru(1)-O(2)         | 2.221(8)  |                  |           |
| Bond angles (°)    |           |                  |           |
| N(3)-Pd(1)-P(3)    | 175.7(3)  | N(2)-Ru(1)-Cl(1) | 162.8(3)  |
| O(3)-Pd(1)-N(1)    | 172.0(4)  | O(2)-Ru(1)-C(39) | 164.0(5)  |
| N(3)-Pd(1)-O(3)    | 91.6(4)   | P(1)-Ru(1)-P(2)  | 171.7(15) |
| N(1)-Pd(1)-N(3)    | 80.3(5)   | O(2)-Ru(1)-N(2)  | 61.5(4)   |

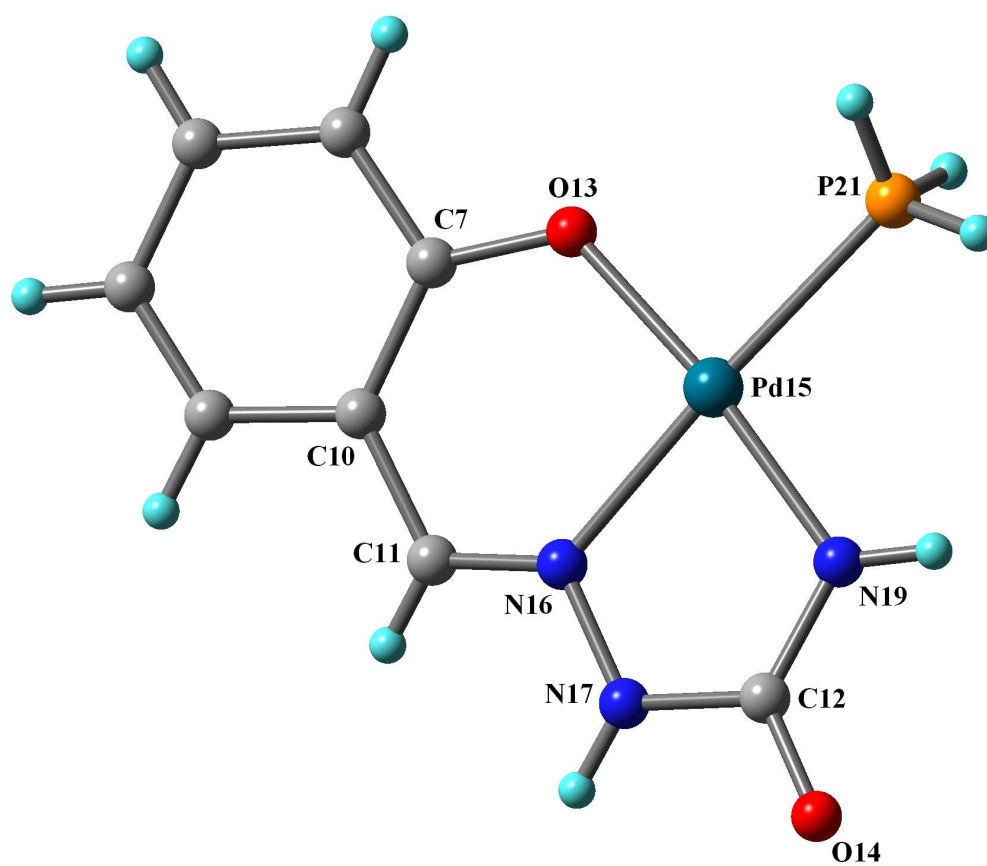

**Fig. S2** DFT optimized structure of complex 1a.

**Table S2** Selected bond distances and bond angles for **1a** and **2b**

| <b>1a</b>          |        |              |        |
|--------------------|--------|--------------|--------|
| Bond distances (Å) |        |              |        |
| Pd15-P21           | 2.269  | C7-O13       | 1.312  |
| Pd15-O13           | 1.983  | C11-N16      | 1.292  |
| Pd15-N16           | 2.033  | N16-N17      | 1.386  |
| Pd15-N19           | 1.976  | N17-C12      | 1.378  |
|                    |        | C12-N19      | 1.337  |
|                    |        | C12-O14      | 1.244  |
| Bond angles (°)    |        |              |        |
| N16-Pd15-P21       | 176.62 | O13-Pd15-N16 | 92.62  |
| O13-Pd15-N19       | 173.00 | N16-Pd-N19   | 80.66  |
| <b>2b</b>          |        |              |        |
| Bond distances (Å) |        |              |        |
| Pd2-P3             | 2.265  | C14-O6       | 1.312  |
| Pd2-O6             | 1.998  | C24-N9       | 1.287  |
| Pd2-N9             | 2.018  | N9-N10       | 1.360  |
| Pd2-N11            | 1.986  | N10-C25      | 1.353  |
| Ru1-P5             | 2.385  | C25-N11      | 1.324  |
| Ru1-P4             | 2.379  | C25-O7       | 1.294  |
| Ru1-Cl13           | 2.399  | C26-O8       | 1.148  |
| Ru1-C26            | 1.823  |              |        |
| Ru1-N10            | 2.065  |              |        |
| Ru1-O7             | 2.243  |              |        |
| Bond angles (°)    |        |              |        |
| N9-Pd2-P3          | 176.58 | N10-Ru1-Cl13 | 161.21 |
| O6-Pd2-N11         | 172.92 | O7-Ru1-C26   | 165.39 |
| O6-Pd2-N9          | 93.08  | P5-Ru-P4     | 176.83 |
| N9-Pd2-N11         | 80.50  | O7-Ru-N10    | 60.94  |

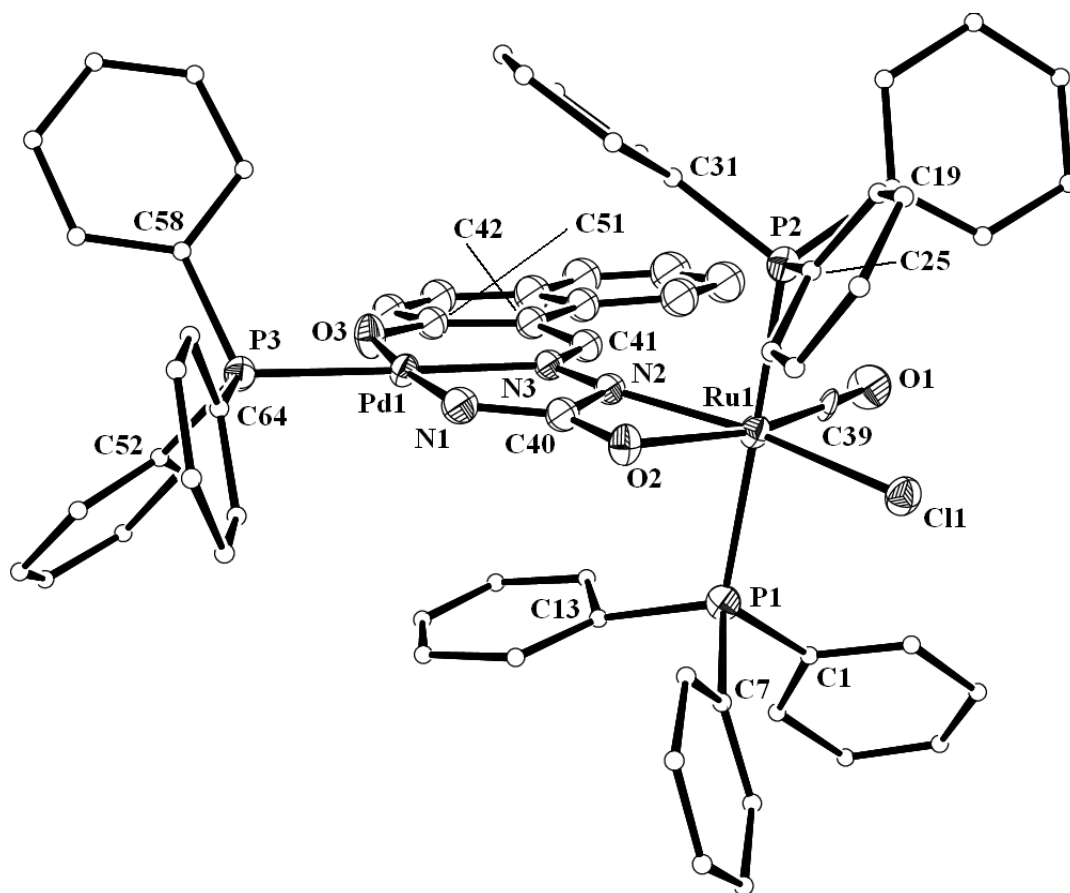

**Fig. S3** View of the 2c complex (one of the four independent molecules is shown here).

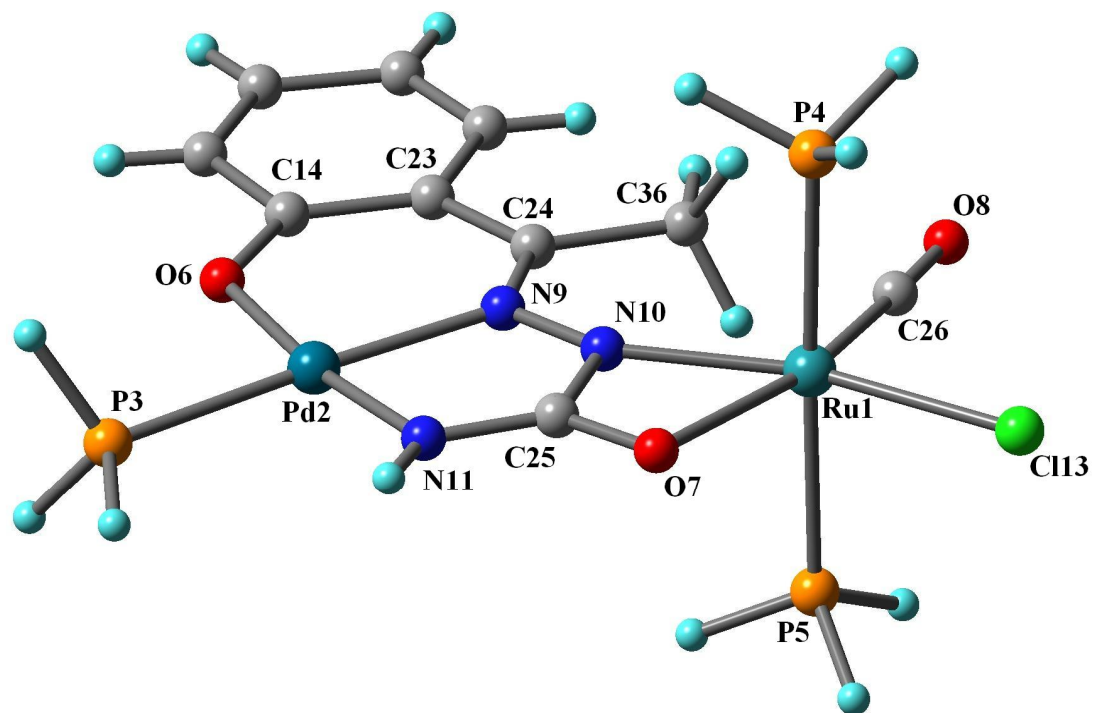

**Fig. S4** DFT optimized structure of complex **2b**.

**Table S3** Crystallographic data for **1c** and **2c**

|                              | <b>1c.H<sub>2</sub>O</b>                                          | <b>2c</b>                                                                            |
|------------------------------|-------------------------------------------------------------------|--------------------------------------------------------------------------------------|
| empirical formula            | C <sub>30</sub> H <sub>26</sub> N <sub>3</sub> O <sub>3</sub> PPd | C <sub>67</sub> H <sub>53</sub> ClIN <sub>3</sub> O <sub>3</sub> P <sub>3</sub> PdRu |
| fw                           | 613.89                                                            | 1283.98                                                                              |
| space group                  | monoclinic, P2 <sub>1</sub> /n                                    | triclinic, P1 <sup>−</sup>                                                           |
| <i>a</i> / Å                 | 9.1000(18)                                                        | 19.145(4)                                                                            |
| <i>b</i> / Å                 | 16.700(3)                                                         | 26.722(6)                                                                            |
| <i>c</i> / Å                 | 18.400(4)                                                         | 26.880(6)                                                                            |
| <i>α</i> / °                 | 90                                                                | 66.307(6)                                                                            |
| <i>β</i> / °                 | 100.39(3)                                                         | 89.242(7)                                                                            |
| <i>γ</i> / °                 | 90                                                                | 87.514(7)                                                                            |
| <i>V</i> / Å <sup>3</sup>    | 2750.4(10)                                                        | 12581(5)                                                                             |
| <i>Z</i>                     | 4                                                                 | 8                                                                                    |
| <i>λ</i> / Å                 | 0.71073                                                           | 0.71073                                                                              |
| cryst size / mm <sup>3</sup> | 0.37 x 0.42 x 0.59                                                | 0.14 × 0.15 × 0.16                                                                   |
| <i>T</i> / K                 | 294                                                               | 293                                                                                  |
| <i>μ</i> / mm <sup>−1</sup>  | 0.769                                                             | 0.691                                                                                |
| R1 <sup>a</sup>              | 0.0731                                                            | 0.0599                                                                               |
| wR2 <sup>b</sup>             | 0.2253                                                            | 0.1497                                                                               |
| GOF <sup>c</sup>             | 1.08                                                              | 1.03                                                                                 |

$$^a R1 = \Sigma ||F_o| - |F_c|| / \Sigma |F_o|$$

$$^b wR2 = [\Sigma \{w(F_o^2 - F_c^2)^2\} / \Sigma \{w(F_o^2)\}]^{1/2}$$

$$^c GOF = [\Sigma (w(F_o^2 - F_c^2)^2) / (M - N)]^{1/2}, \text{ where } M \text{ is the number of reflections and } N \text{ is the number of parameters refined.}$$
